# Supplementary material for: Suboptimal SARS-CoV-2−specific CD8+ T cell response associated with the prominent HLA-A*02:01 phenotype
Source: PubMed Central journal article supplement (PMC7533701; doi:10.1073/pnas.2015486117), 2020-09-10
Supplement: pnas.2015486117.sapp.pdf [file pnas.2015486117.sapp.pdf]

## **Suboptimal SARS-CoV-2-specific CD8<sup>+</sup> T-cell response associated with the prominent HLA-A\*02:01 phenotype**

Jennifer R Habel<sup>1</sup>, Thi H O Nguyen<sup>1</sup>, Carolien E van de Sandt<sup>1,2</sup>, Jennifer A Juno<sup>1</sup>, Priyanka Chaurasia<sup>3</sup>, Kathleen Wragg<sup>1</sup>, Marios Koutsakos<sup>1</sup>, Luca Hensen<sup>1</sup>, Xiaoxiao Jia<sup>1</sup>, Brendon Chua<sup>1</sup>, Wuji Zhang<sup>1</sup>, Hyon-Xhi Tan<sup>1</sup>, Katie L Flanagan<sup>4,5,6,7</sup>, Denise L Doolan<sup>8</sup>, Joseph Torresi<sup>1</sup>, Weisan Chen<sup>9</sup>, Linda M Wakim<sup>1</sup>, Allen C Cheng<sup>10,11</sup>, Peter C Doherty<sup>1,12\*</sup>, Jan Petersen<sup>3,13</sup>, Jamie Rossjohn<sup>3,13,14</sup>, Adam K Wheatley<sup>1,15</sup>, Stephen J Kent<sup>1,15</sup>, Louise C Rowntree<sup>1\*</sup> and Katherine Kedzierska<sup>1\*</sup>

Corresponding author: Peter C Doherty  
Email: [pcd@unimelb.edu.au](mailto:pcd@unimelb.edu.au)

### **This PDF file includes:**

Supplementary text  
Figures S1 to S3  
Tables S1 to S3  
Legends for Datasets S1

### **Other supplementary materials for this manuscript include the following:**

Datasets S1

## Supplementary Information Text

### METHODS

#### Cell lines and reagents

C1R.A\*02:01 cells were maintained in RF-10 medium (RPMI-1640 with 10% heat-inactivated FCS (Gibco; Thermo Fisher Scientific)), with 0.3 mg/mL hygromycin-B (Life Technologies). Overlapping synthetic peptides spanning the entire Nucleocapsid (N) and Membrane (M) proteins, and selected regions of SARS-CoV2 Spike (S) were purchased from Miltenyi Biotec (PepTivator SARS-CoV-2 Prot\_N (130-126-699), Prot\_M (130-126-703) and Prot\_S (130-126-701)) and reconstituted in 80% DMSO. Synthetic SARS-CoV2 peptides predicted to bind HLA-A\*02:01 were purchased from GenScript and reconstituted in DMSO. Tetramers were generated from soluble, biotinylated HLA-A2 monomers. Briefly, HLA  $\alpha$ -heavy chain with C-terminal BirA biotinylation motif and  $\beta$ 2-microglobulin were expressed and purified as inclusion bodies in *E. coli*, solubilized in 6 M Guanidine HCl and refolded with either S<sub>269</sub> or Orf1ab<sub>3183</sub> peptide, in buffer containing 50 mM Tris pH8, 3 M urea, 0.4 M Arginine, 2 mM oxidised Glutathione, 20 mM Glutathione, 2 mM EDTA, 10 mM PMSF and cComplete™ protease inhibitor (Roche). Following dialysis in 10 mM Tris, HLA monomers were purified via DEAE and HiTrapQ ion exchange chromatography, and biotinylated with BirA ligase in 50 mM Bicine pH 8.3, 10 mM ATP, 10 mM magnesium acetate and 100  $\mu$ m d-biotin. Following S200 gel permeation chromatography fully biotinylated HLA monomers were stored at -80 °C and conjugated to fluorescently-labeled streptavidins (SA), PE-SA or APC-SA (BD Biosciences) at an 8:1 monomer to SA molar ratio to form pMHC-I tetramers.

#### Intracellular cytokine staining (ICS)

PBMCs and tonsil samples were stimulated with either 0.6 nmol of overlapping SARS-CoV2 peptides or 1  $\mu$ M A2/SARS-CoV2 predicted peptides for 10 days in RF-10 medium (+20 U/mL IL-2) (29). On d10, cells were stimulated with peptides for 6 hrs in the presence of GolgiPlug and GolgiStop (BD Bioscience) plus 10 U/mL IL-2, and the SARS-CoV2-reactive T cells quantified using anti-IFN- $\gamma$ -V450, anti-TNF-AF700, anti-MIP-1 $\beta$ -APC, anti-CD107a-AF488 (BD) and anti-perforin-PE-Cy7 (BioLegend) ICS (30). CD8<sup>+</sup> T cells specific for A2/SARS-CoV2 epitopes were quantified using IFN- $\gamma$ /TNF ICS with C1R.A\*02:01 cells used as antigen-presenting cells.

#### Ex vivo tetramer enrichment and phenotypic analysis

Cells (1-86x10<sup>6</sup>) were stained with A2/S<sub>269</sub>-PE and A2/Orf1ab<sub>3183</sub>-APC tetramers at 1:100 for 1 hr in MACS buffer (PBS with 0.5% BSA and 2 mM EDTA). PBMCs and tonsil samples were incubated with anti-PE and anti-APC microbeads (Miltenyi) and tetramer<sup>+</sup> cells were enriched using magnetic separation (18, 19). Cells were stained with anti-CD71-BV421, anti-CD4-BV650, anti-CD27-BV711, anti-CD38-BV786, anti-CD14-APC-H7, anti-CD19-APC-H7, anti-CD45RA-FITC, anti-CD8-PerCP-Cy5.5, anti-CD95-PE-CF594 and anti-PD1-PE-Cy7 (BD) and anti-CD3-BV510, anti-HLA-DR-BV605 (Biolegend) and Live/Dead near-infrared (Invitrogen) for 30 mins, washed, resuspended in MACS buffer and analysed by flow cytometry. Lung cells were stained with the following alterations; anti-CD69-BV421, anti-CD103-FITC (BioLegend), and anti-CD45RO-PE-Cy7 (Thermo Fisher Scientific). To detect granzymes and perforin, cells were stained with A2/S<sub>269</sub>-APC and enriched, then surface stained with anti-CD27-BV711, anti-CD3-PE-CF594, anti-CD4-BV650, anti-CD45RA-FITC, anti-CD19-APC-H7, anti-CD14-APC-H7 (BD), anti-CD8-BV421 (Biolegend) and Live/Dead aqua (Invitrogen) and stained intracellularly with anti-Granzyme-B-AF700 (BD), anti-Perforin-PE-Cy7 (Biolegend), anti-Granzyme-A-PE and

anti-Granzyme-K-PerCP-eFluor710 (eBioscience) after fixation/permeabilization with eBioscience™ Foxp3/Transcription Factor Staining Buffer Set (Thermo Fisher Scientific). Samples were acquired on a BD LSRII Fortessa. Flow cytometry data were analyzed using FlowJo v10 software.

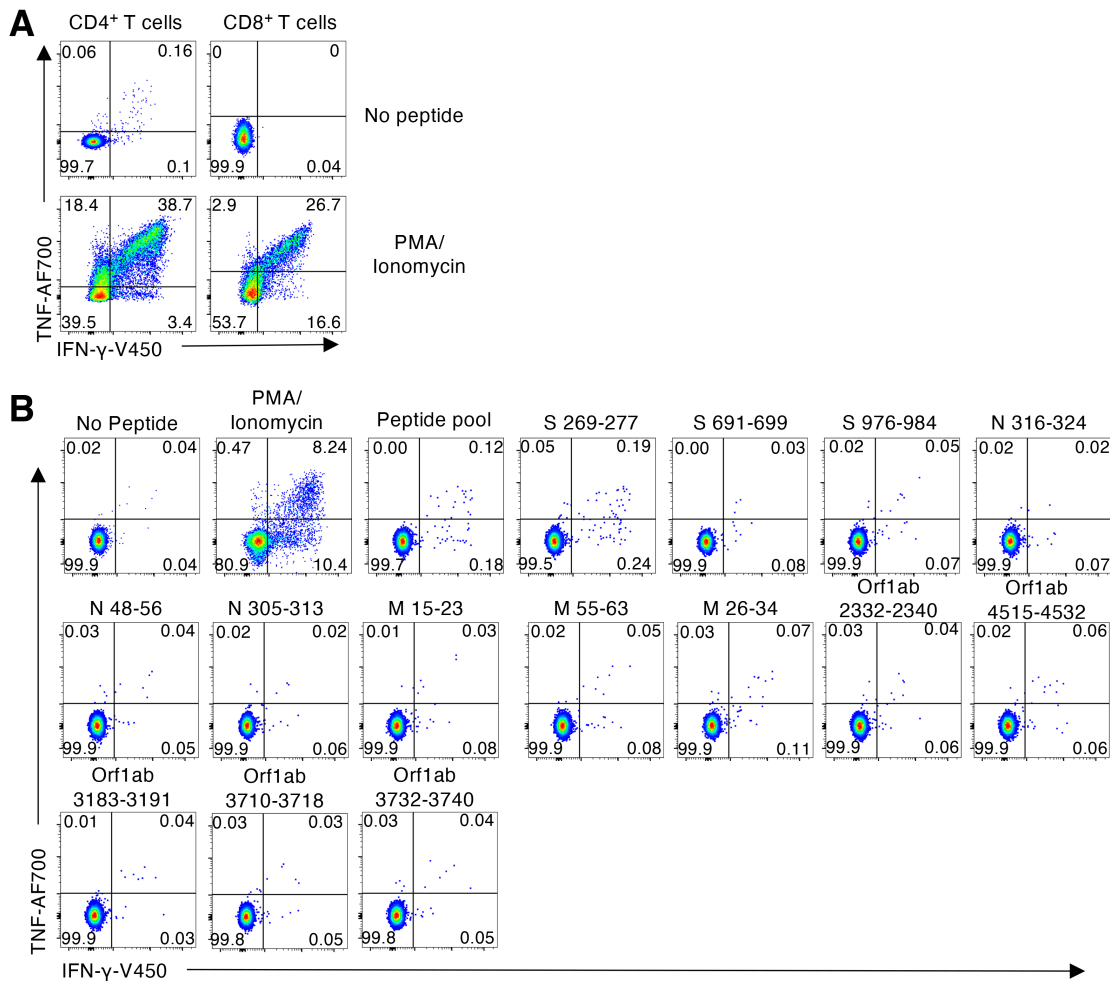

**Fig. S1.** (A) Representative FACS plots of IFN- $\gamma$ /TNF staining of CD4<sup>+</sup> and CD8<sup>+</sup> T-cells stimulated with PMA-I (positive control) and DMSO (negative control) after d10 expansion *in vitro* with SARS-CoV-2 overlapping peptide pools. (B) Representative FACS plots after d10 culture with A2/SARS-CoV-2 predicted peptides. IFN- $\gamma$ /TNF staining of CD8<sup>+</sup> T-cells stimulated with PMA-I (positive control), DMSO (negative control), SARS-CoV-2 predicted peptide pool and individual A2/SARS-CoV-2 peptides.

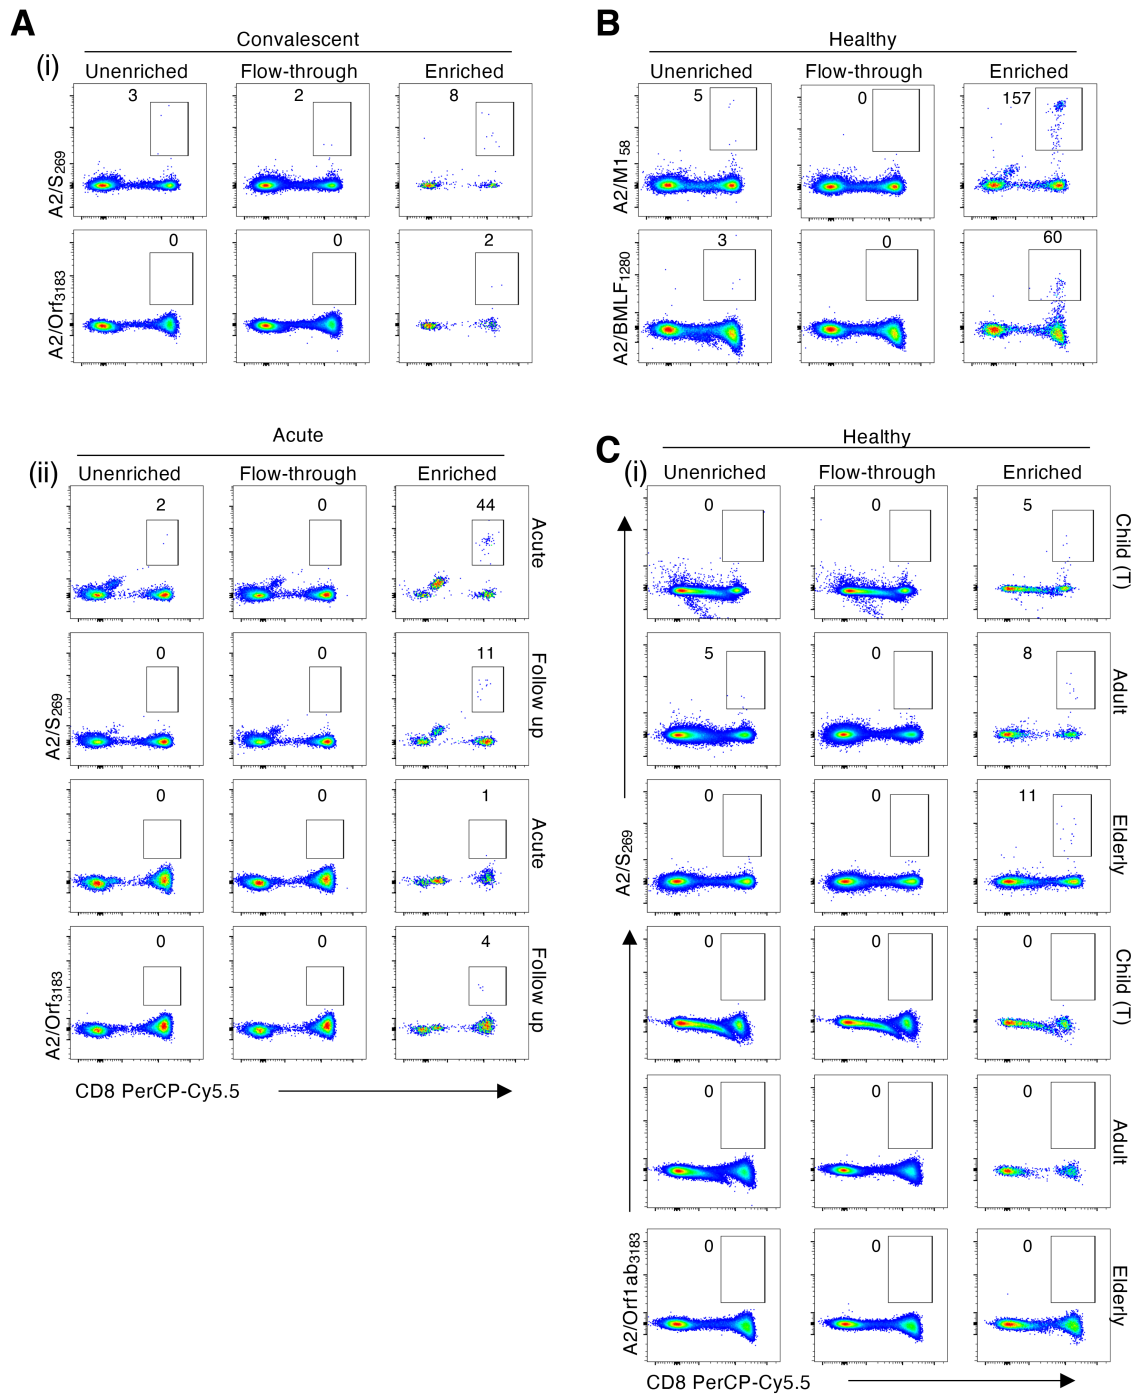

**Fig. S2.** (A) Representative FACS plots of A2/S<sub>269</sub><sup>+</sup>CD8<sup>+</sup> and A2/Orf1ab<sub>3183</sub><sup>+</sup>CD8<sup>+</sup> T-cells from unenriched, enriched and flow-through samples of (i) convalescent and (ii) acute COVID-19 PBMCs. (B) Representative FACS plots of A2/M1<sub>58</sub><sup>+</sup>CD8<sup>+</sup> and A2/BMLF<sub>1280</sub><sup>+</sup>CD8<sup>+</sup> T-cells from unenriched, enriched and flow-through samples of healthy PBMCs. (C) Representative FACS plots of A2/S<sub>269</sub><sup>+</sup>CD8<sup>+</sup> and A2/Orf1ab<sub>3183</sub><sup>+</sup>CD8<sup>+</sup> T-cells from unenriched, enriched and flow-through samples of adult and elderly PBMCs, and children tonsils (T).

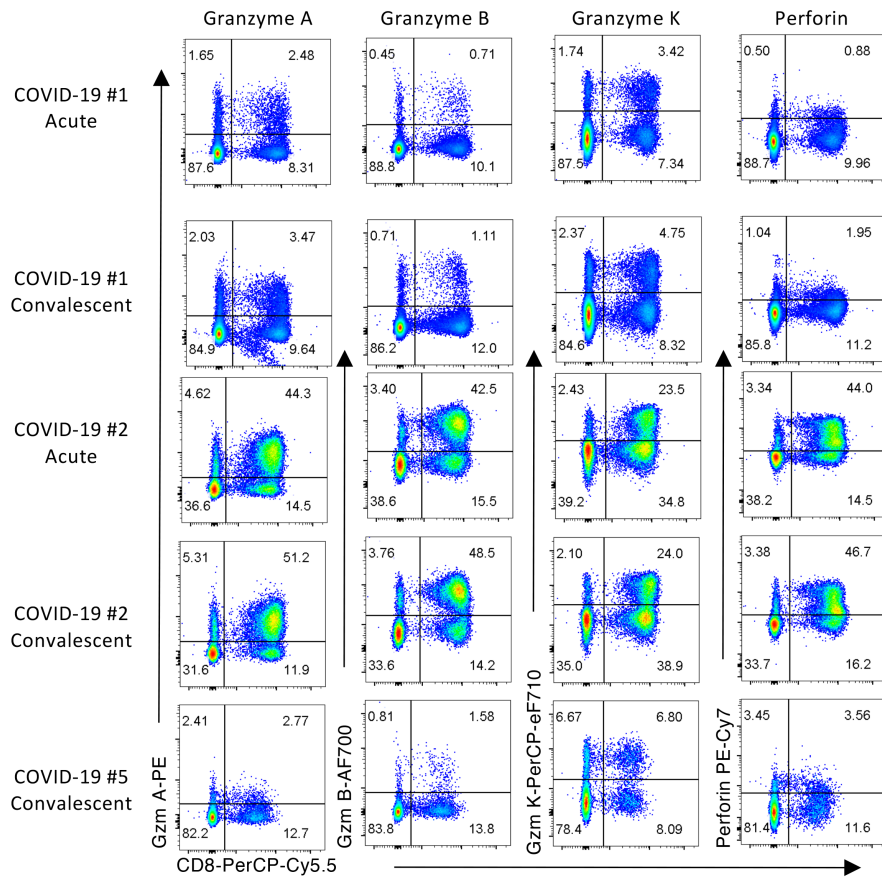

**Fig. S3.** FACS plots showing staining for granzymes A, B and K, and perforin of the CD3<sup>+</sup> population from acute and convalescent COVID-19 PBMCs.

**Table S1.** Demographic and clinical data for COVID-19 patients

| Donor code   | SARS-CoV-2 PCR | Seropositive SARS-CoV2* | Specimen | Age | Sex | Days from disease onset |              | Hospital (acute disease) | Oxygen (acute disease) | HLA-A        | HLA-B        | HLA-Cw       |
|--------------|----------------|-------------------------|----------|-----|-----|-------------------------|--------------|--------------------------|------------------------|--------------|--------------|--------------|
|              |                |                         |          |     |     | Acute                   | Convalescent |                          |                        |              |              |              |
| COVID-19 #1  | positive       | yes                     | blood    | 72  | F   | 11                      | 38           | yes                      | yes                    | 02:01        | 07:02, 15:18 | 07:02, 07:04 |
| COVID-19 #2  | positive       | yes                     | blood    | 38  | M   | 12                      | 41           | yes                      | no                     | 02:01        | 15:01, 37:01 | 03:03, 06:02 |
| COVID-19 #3  | positive       | yes                     | blood    | 73  | F   | 10                      | 44           | yes                      | yes                    | 01:01, 02:01 | 37:01, 40:01 | 03:03, 06:02 |
| COVID-19 #4  | positive       | yes                     | blood    | 62  | F   | -                       | 102          | yes                      | no                     | 03:01, 23:01 | 44:02; 44:03 | 04:01, 05:01 |
| COVID-19 #5  | positive       | yes                     | blood    | 54  | M   | -                       | 46, 101      | yes                      | no                     | 02:01, 31:01 | 38:01; 44:03 | 04:01, 12:03 |
| COVID-19 #6  | positive       | yes                     | blood    | 56  | F   | -                       | 101          | yes                      | no                     | 01:01        | 08:01, 57:01 | 06:02, 07:01 |
| COVID-19 #7  | positive       | yes                     | blood    | 76  | M   | -                       | 36           | yes                      | no                     | 01:01, 02:01 | 08:01, 35:01 | 04:01, 07:01 |
| COVID-19 #8  | positive       | yes                     | blood    | 52  | F   | -                       | 37           | no                       | no                     | 02:01, 31:01 | 40:01, 51:01 | 03:04, 05:01 |
| COVID-19 #9  | positive       | yes                     | blood    | 22  | F   | -                       | 42           | no                       | no                     | 02:01        | 44:02, 51:01 | 05:01        |
| COVID-19 #10 | positive       | yes                     | blood    | 65  | M   | -                       | 41           | no                       | no                     | 02:01, 24:02 | 07:02, 14:02 | 07:02, 08:02 |
| COVID-19 #11 | positive       | yes                     | blood    | 56  | M   | -                       | 55           | no                       | no                     | 02:01, 26:01 | 44:02        | 05:01, 06:02 |
| COVID-19 #12 | positive       | yes                     | blood    | 31  | M   | -                       | 48           | no                       | no                     | 01:01, 69:01 | 55:01, 57:01 | 01:02, 06:02 |
| COVID-19 #13 | positive       | yes                     | blood    | 49  | F   | -                       | 49           | no                       | no                     | 01:01, 11:01 | 08:01, 18:01 | 07:01        |
| COVID-19 #14 | positive       | yes                     | blood    | 55  | M   | -                       | 56           | no                       | no                     | 33:01, 68:01 | 14:02, 35:03 | 04:01, 08:02 |
| COVID-19 #15 | positive       | yes                     | blood    | 24  | F   | -                       | 45           | no                       | no                     | 02:01        | 39:01, 44:02 | 07:02, 07:04 |
| COVID-19 #16 | positive       | yes                     | blood    | 51  | F   | -                       | 93           | no                       | no                     | 02:01        | 07:02, 44:02 | 05:01, 07:02 |
| COVID-19 #17 | NT             | yes                     | blood    | 54  | F   | -                       | 94           | no                       | no                     | 02:01, 29:02 | 14:01, 44:03 | 08:02, 16:01 |
| COVID-19 #18 | positive       | yes                     | blood    | 24  | M   | -                       | asymptomatic | no                       | no                     | 01:01, 32:01 | 08:01, 14:01 | 07:01, 08:02 |

\*seropositive by RBD ELISA; F: female; M: male; NT: not tested; Blood: heparinized blood

**Table S2.** Demographic data for healthy individuals

| Donor code  | Group   | Specimen          | Age | Sex | HLA-A        | HLA-B        | HLA-Cw        |
|-------------|---------|-------------------|-----|-----|--------------|--------------|---------------|
| Healthy #1  | Adult   | Heparinized blood | 30  | F   | 02:01, 02:03 | 38:02, 40:01 | 07:02, 15:02  |
| Healthy #2  | Adult   | Heparinized blood | 52  | M   | 02:01, 03:01 | 07:02, 55:02 | 03:03, 07:02  |
| Healthy #3  | Adult   | Buffy pack        | 50  | M   | 02:01, 29:02 | 44:02, 44:03 | 05:01, 16:01  |
| Healthy #4  | Adult   | Buffy pack        | 58  | F   | 01:01, 02:01 | 44:02        | 05:01         |
| Healthy #5  | Elderly | Buffy pack        | 72  | NR  | 02:01, 11:01 | 07:02, 44:02 | 05:01, 07:02  |
| Healthy #6  | Elderly | Buffy pack        | 68  | NR  | 01:01, 02:01 | 08:01, 14:01 | 07:01, 08:02  |
| Healthy #7  | Elderly | Buffy pack        | 65  | NR  | 02:01, 30:01 | 13:02, 44:03 | 06:02, 16:01  |
| Healthy #8  | Elderly | Buffy pack        | 65  | F   | 02:01, 03:01 | 07:02, 44:03 | 07:02, 16:01  |
| Healthy #9  | Child   | Tonsil            | 5   | M   | 02:01, 68:01 | 38:01, 44:02 | 05:01, 12:03  |
| Healthy #10 | Child   | Tonsil            | 11  | M   | 02:01, 31:01 | 07:02, 38:01 | 07:02, 12:03  |
| Healthy #11 | Child   | Tonsil            | 16  | F   | 01:01, 02:01 | 08:01, 44:03 | 07:01, 16:01  |
| Healthy #12 | Child   | Tonsil            | 8   | M   | 02:01        | 14:01, 57:01 | 06:02, 08:02  |
| Healthy #13 | Adult   | Lung              | 61  | M   | 02, 26       | 37, 55       | 06, 09        |
| Healthy #14 | Adult   | Lung              | 65  | M   | 02, 02       | 44, 57       | 05, 06, Cw5,6 |
| Healthy #15 | Adult   | Lung              | 42  | M   | 02, 26       | 15, 35       | 04, 05, Cw4,5 |
| Healthy #16 | Adult   | Lung              | 41  | F   | 02, 25       | 07, 08       | 07, 07        |
| Healthy #17 | Adult   | Lung              | 30  | M   | 02, 68       | 15, 51       | 03, 15        |

F: female; M: male; NR: not reported.



**Table S3.** A2/CD8<sup>+</sup> SARS-CoV2 epitope prediction and conservation

| Protein*                   | Sequence <sup>†</sup> | Residues  | hCoV conservation | SARS-CoV1 conservation | MERS-CoV conservation |
|----------------------------|-----------------------|-----------|-------------------|------------------------|-----------------------|
| Spike                      | YLQPRTFLL             | 269-277   | 0%                | 67%                    | 78%                   |
|                            | SIIAYTMSL             | 691-699   |                   |                        |                       |
|                            | VLNDILSRL             | 976-984   | 0%                | 100%                   | 0%                    |
| Nucleocapsid               | GMSRIGMEV             | 316-324   |                   |                        |                       |
|                            | NTASWFTAL             | 48-56     |                   |                        |                       |
|                            | AQFAPSASA             | 305-313   |                   |                        |                       |
| Membrane                   | KLLEQWNLV             | 15-23     |                   |                        |                       |
|                            | WLLWPVTLA             | 55-63     |                   |                        |                       |
|                            | FLFLTWICL             | 26-34     |                   |                        |                       |
| Polyprotein1ab<br>(Orf1ab) | ILFTRFFYV             | 2332-2340 |                   |                        |                       |
|                            | TMADLVYAL             | 4515-4523 |                   |                        |                       |
|                            | FLLNKEMYL             | 3183-3191 | 0%                | 100%                   | 0%                    |
|                            | SMWALIISV             | 3732-3740 |                   |                        |                       |
|                            | TLMNVLTLV             | 3710-3718 |                   |                        |                       |

\*Protein sequences obtained from SARS-CoV-2 Reference Sequence (Refseq accession NC\_045512.2; Protein ID YP\_009724390.1, YP\_009724397.2, YP\_009724393.1, YP\_009724389.1, respectively)

<sup>†</sup>Peptides provided by Genscript, Hong Kong, at >80% purity

**Dataset S1** (separate file: Source data\_Habel et al. xlsx). Source data for Figures 1-4.
